# Supplementary material for: Enhanced perovskite morphology and crystallinity for high performance perovskite solar cells using a porous hole transport layer from polystyrene nanospheres
Source: Royal Society of Chemistry journal article supplement (doi:10.1039/c6cp06405a), 2016-01-01
Supplement: c6cp06405a1.pdf [file c6cp06405a1.pdf]

# Enhanced perovskite morphology and crystallinity for high performance perovskite solar cells using porous Hole Transport Layer from polystyrene nanospheres

*Fan Zhang,<sup>‡1,2</sup> Jun Song,<sup>‡\*2</sup> Ming Chen,<sup>1</sup> Junchen Liu,<sup>2</sup> Yuying Hao,<sup>\*1</sup> Yuncai Wang,<sup>1</sup> Junle Qu<sup>2</sup>  
and Pengju Zeng<sup>2</sup>*

1. Taiyuan University of Technology, Taiyuan 030024, China.

2. Institute of Optoelectronics, Key Lab of Optoelectronics Devices and Systems of Ministry of Education/Guangdong Province, Shenzhen University, Shenzhen 518060, China. E-mail: songjun@szu.edu.cn .

<sup>‡</sup> These authors contributed equally to this work.

## Supplementary Figures

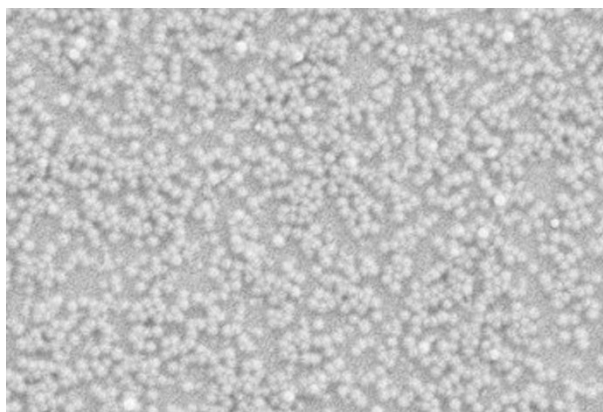

**Figure S1** Top-view SEM image for the PS/PEDOT:PSS films with the PS/PEDOT: PSS volume ratio of 1:5.

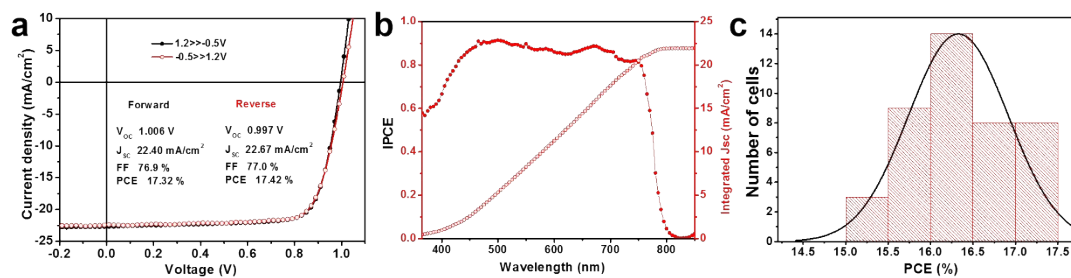

**Figure S2** (a) J–V curves and (b) incident photon to current conversion efficiency (IPCE) spectrum together with IPCE data based integrated short-circuit current density ( $J_{sc}$ ) for the best performing perovskite solar cell. (c) Histograms of the PCE parameters in 40 cells.

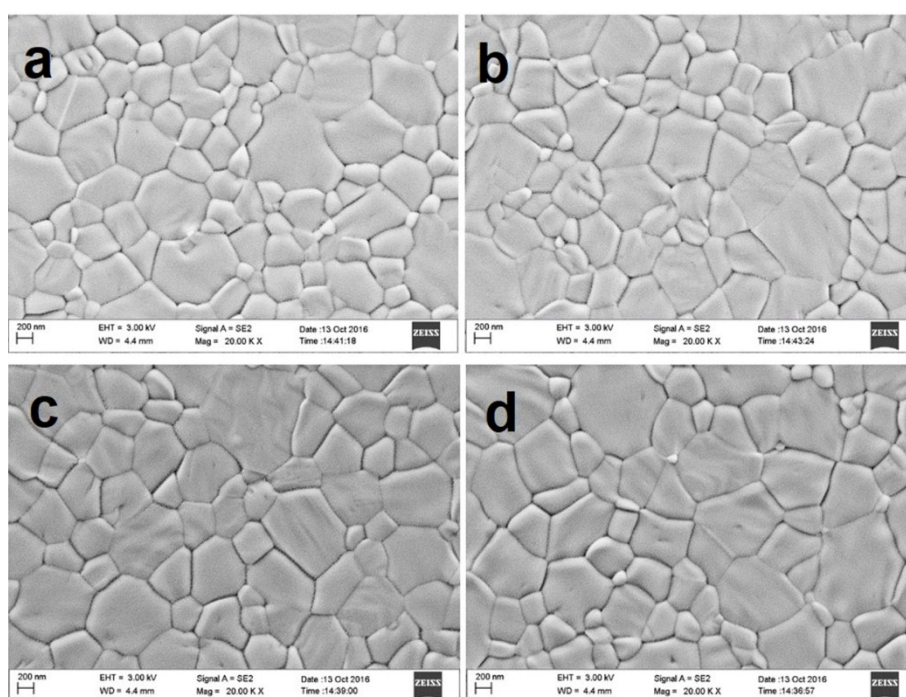

**Figure S3** Top-view scanning electron microscope (SEM) images for the CH<sub>3</sub>NH<sub>3</sub>PbI perovskite films on porous PEDOT:PSS with PS/PEDOT:PSS volume ratio of 1:15, 1:9, 1:5 and 1:3, respectively.

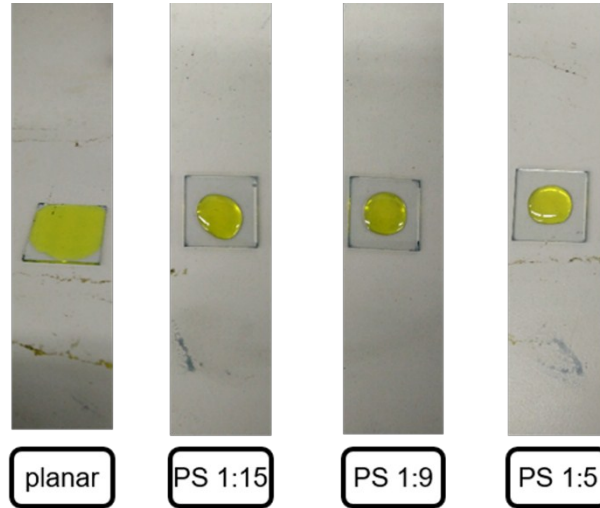

**Figure S4** Photographs of the precursor solution (100  $\mu\text{L}$ ) on planar and porous PEDOT:PSS layer.

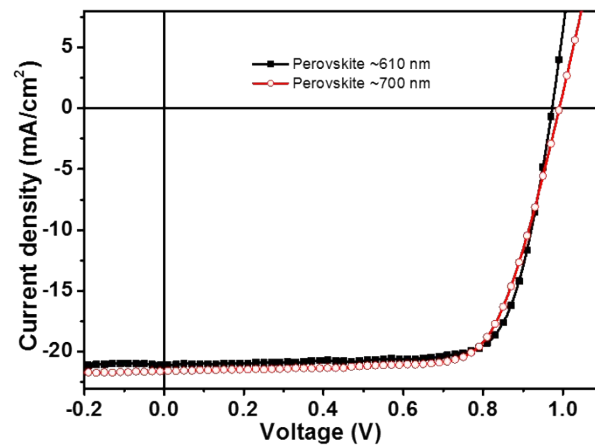

**Figure S5** J-V curves of the PSCs with perovskite thickness about 610 nm and 700 nm, the perovskite were all deposited on planar-PEDOT:PSS layer.

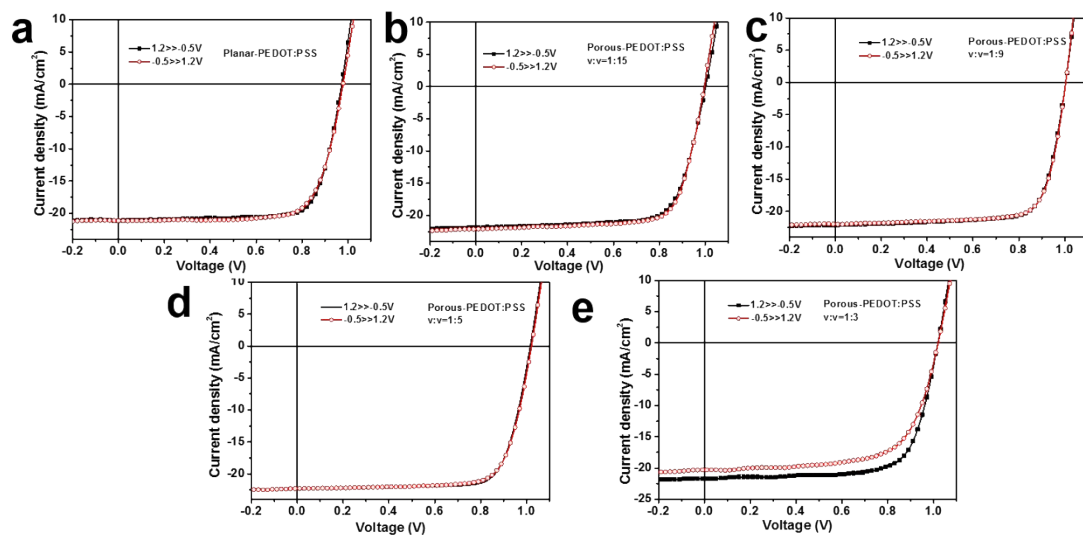

**Figure S6** J-V curves of devices with different PEDOT:PSS layer, (a) planar-PEDOT:PSS, (b, c, d, e) porous-PEDOT:PSS with PEDOT:PSS volume ratio of 1: 15, 1:9, 1:5 and 1:3, measured using forward and backward scans.
